# Supplementary material for: The Role of Bradykinin Receptors in the Etiopathogenesis of Chronic Spontaneous Urticaria
Source: MDPI journal article supplement (doi:10.3390/medicina57101133), 2021-10-19
Supplement: s1 [file s1]

## Supplementary Materials

**Fig S1. Gating strategy** for the analysis of CD14<sup>++</sup>CD16<sup>-</sup>, CD14<sup>++</sup>CD16<sup>+</sup>, CD14<sup>+</sup>CD16<sup>+</sup> and CD4<sup>+</sup> and CD8<sup>+</sup> monocytes and T cells subsets, respectively.

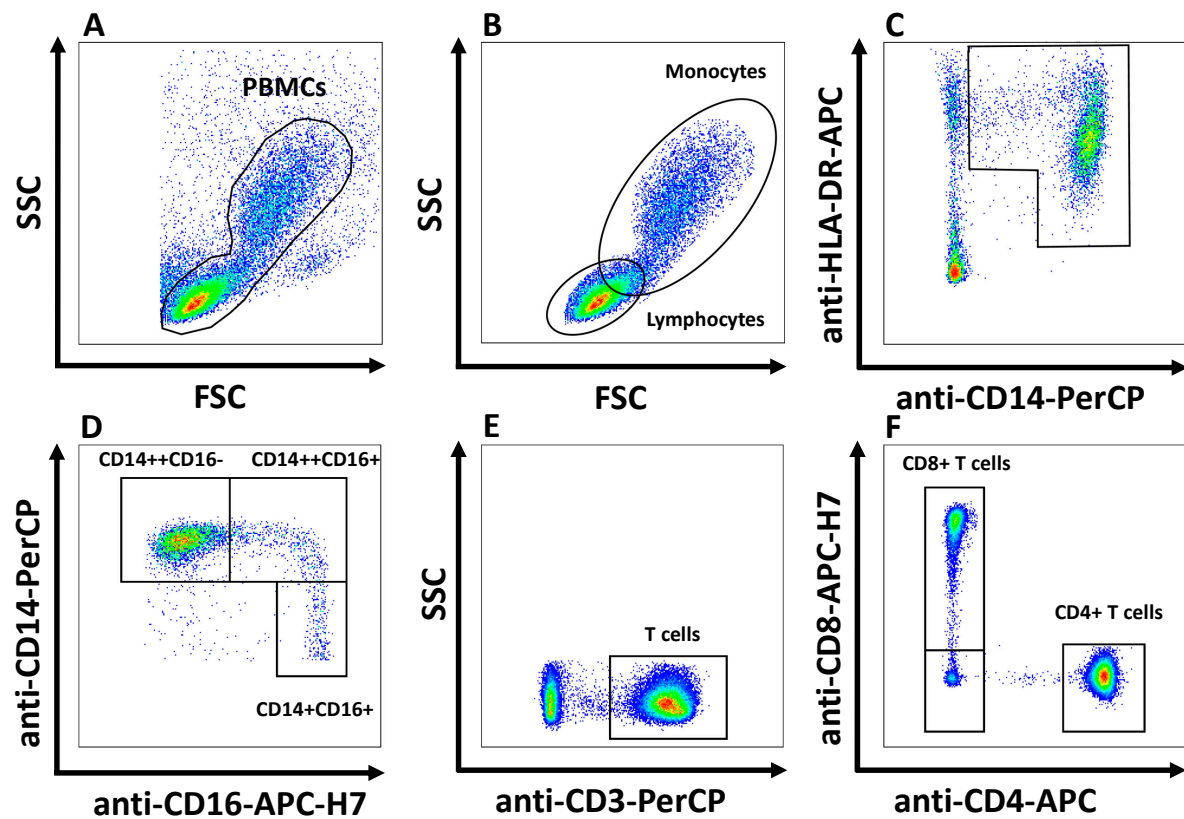

**Fig S2. Box plot of BR1 (A) and BR (2) expression on CD3+ (left panel) CD4+ (center panel) and CD8+ (right panel) cells.**

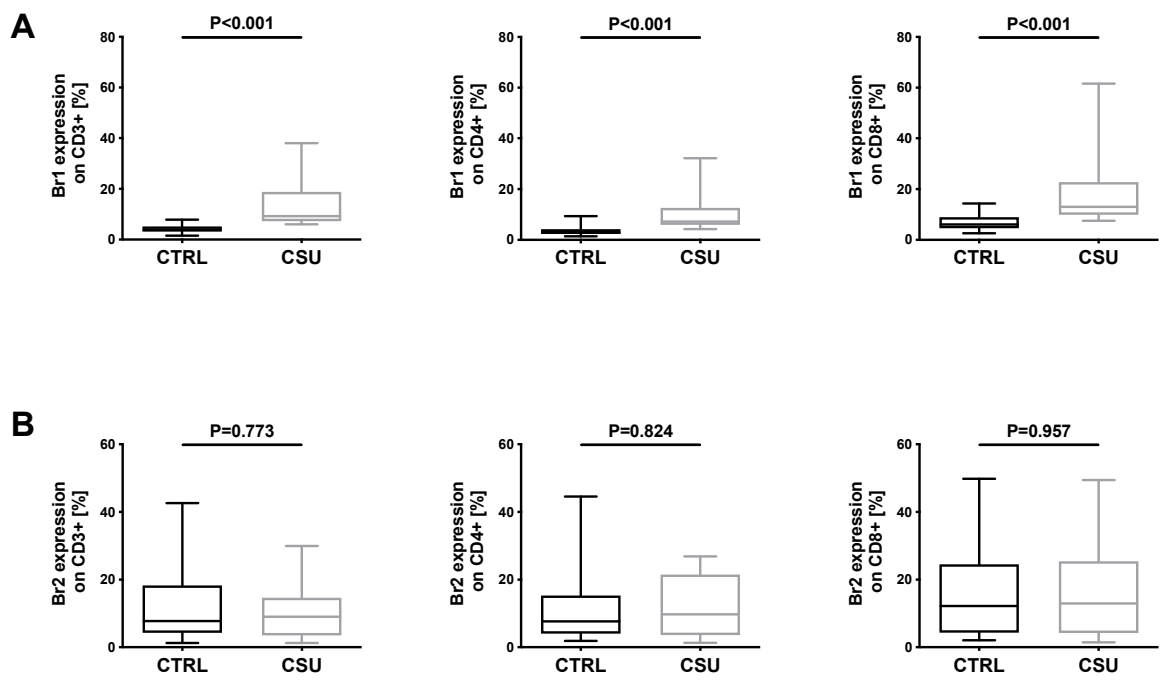

**Fig S3. Box plot of BR1 (A) and BR (2) expression on Monocytes, CD14<sup>++</sup>CD16<sup>-</sup>, CD14<sup>++</sup>CD16<sup>+</sup> and CD14<sup>+</sup>CD16<sup>+</sup> cells.**

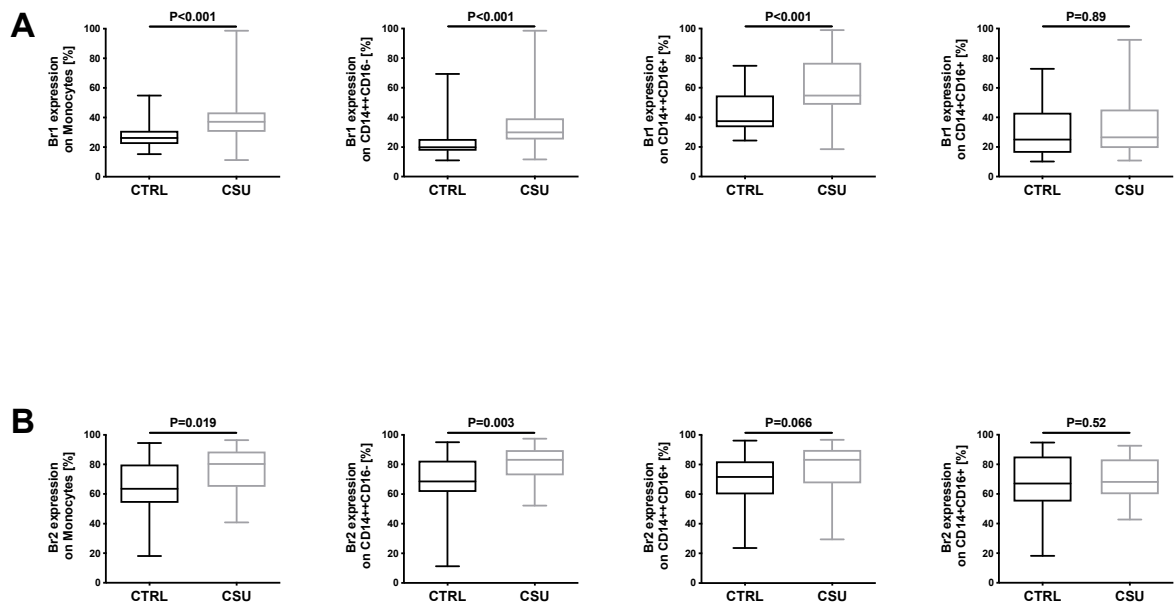

**Fig S4. Representative Facs plots for BR1 and BR2 expression on T cells (FMO Control).**

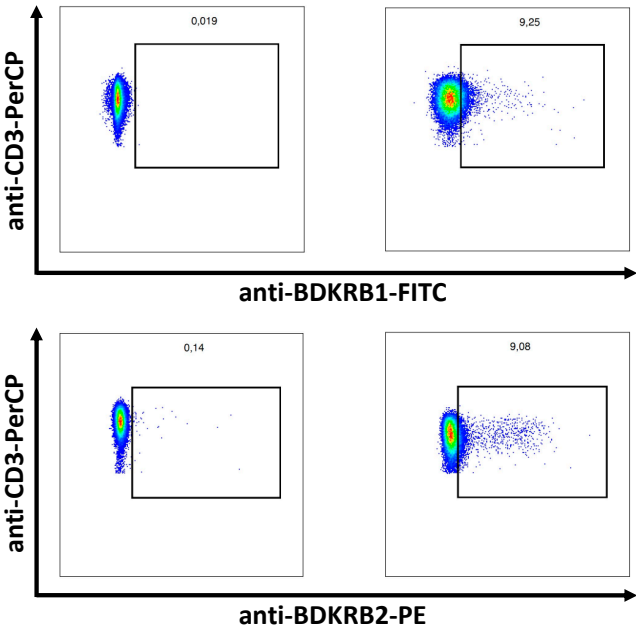

**Fig S5. Representative Facs plots for BR1 and BR2 expression on monocytes (FMO Control).**

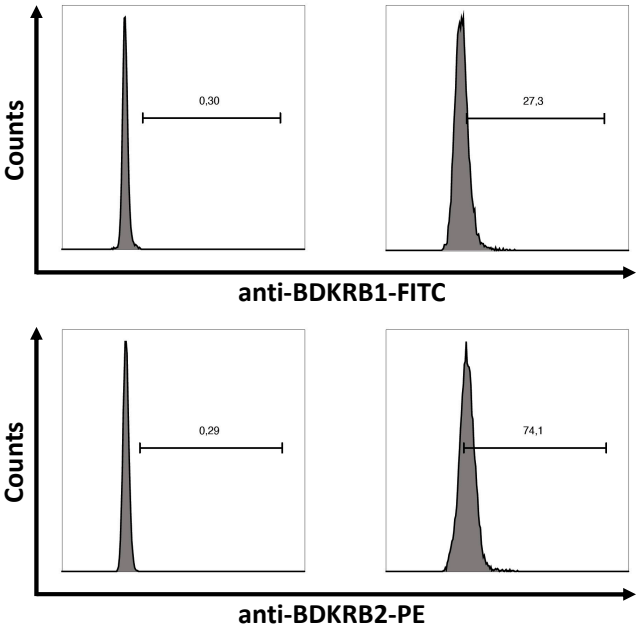

**Table S1**

| <b>Antibody</b>                       | <b>Clone</b> | <b>Fluorochrome</b> | <b>Manufacturer</b>               |
|---------------------------------------|--------------|---------------------|-----------------------------------|
| anti-CD3                              | SK7          | PerCP               | BD, San Jose, CA, USA             |
| anti-CD4                              | RPA-T4       | APC                 | BD                                |
| anti-CD8                              | SK1          | APC-H7              | BD                                |
| anti-HLA-DR                           | L243         | APC                 | BD                                |
| anti-CD14                             | MoP9         | PerCP               | BD                                |
| <i>anti-CD16</i>                      | 3G8          | APC-H7              | BD                                |
| anti-BDKRB1                           | polyclonal   | FITC                | Bioss Antibodies, Woburn, MA, USA |
| anti-BDKRB2 (primary)                 | EPR5646      |                     | Abcam, Cambridge, UK              |
| secondary antibody<br>anti-rabbit IgG | 2A9          | PE                  | Abcam                             |

**Table S1: List of the antibodies used for the staining.**
